# Supplementary material
Source: Royal Society of Chemistry journal article supplement (doi:10.1039/d6sm00153j)
Supplement: d6sm00153j1.pdf [file d6sm00153j1.pdf]

## Supplementary Information

# **Modeling the organizational heterogeneity of cholesterol-enriched microdomains in the neuronal membranes of gray and white matter of Alzheimer's brain: A computational lipidomics study**

Sruthi Peesapati, Sandipan Chakraborty\*

Center for Innovation in Molecular and Pharmaceutical Sciences (CIMPS), Dr. Reddy's Institute of Life Sciences, University of Hyderabad Campus, Gachibowli, Hyderabad 500046, India

\*To whom correspondence should be addressed:

**Sandipan Chakraborty:** Email: sandipanc@drils.org, sandipanchakraborty.13@gmail.com  
ORCID ID: 0000-0001-8759-1074;

**Table S1:** The representative structures of lipids used in the current study.

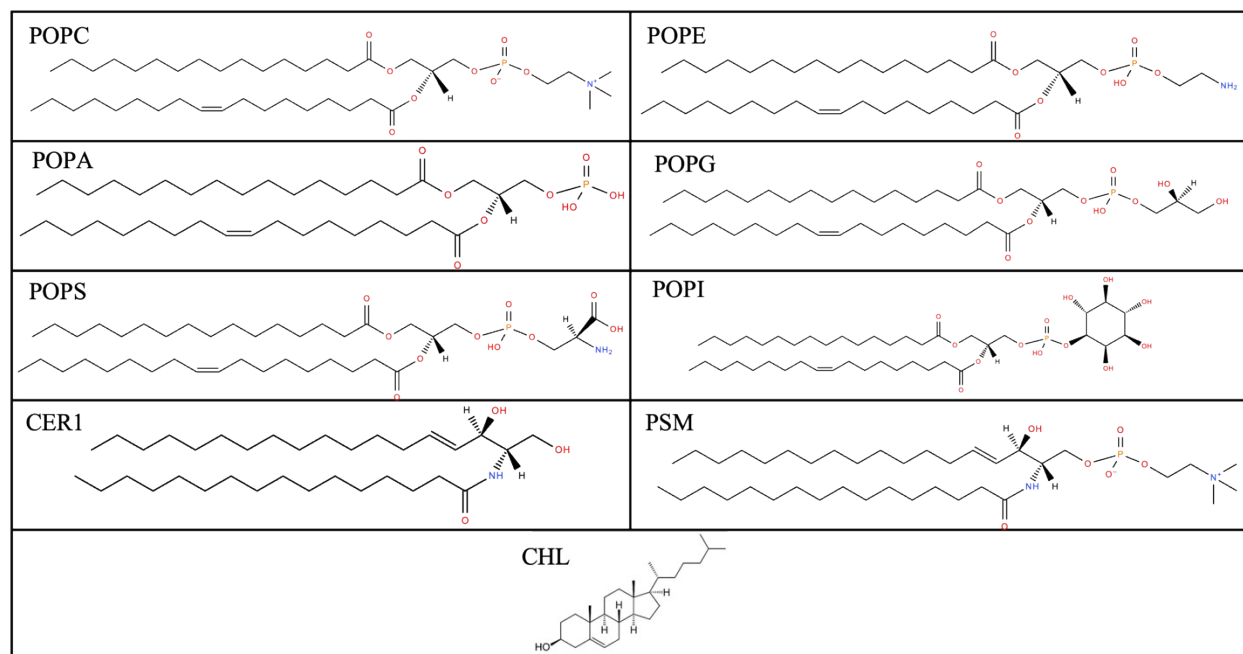

**Table S2:** The composition of individual lipid components in outer and inner leaflets for the four systems studied. (OL: outer leaflet, IL: inner leaflet).

| Concentration in mol % |               |     |      |          |     |      |               |      |      |          |      |      |      |
|------------------------|---------------|-----|------|----------|-----|------|---------------|------|------|----------|------|------|------|
| Brain model            | Gray matter   |     |      |          |     |      | White matter  |      |      |          |      |      |      |
|                        | Healthy Brain |     |      | AD Brain |     |      | Healthy Brain |      |      | AD Brain |      |      |      |
| Lipid                  | Avg           | OL  | IL   | Avg      | OL  | IL   | Avg           | OL   | IL   | Avg      | OL   | IL   | IL   |
| CHOL                   | 46            | 46  | 46   | 50       | 50  | 50   | 56.5          | 56.5 | 56.5 | 55.5     | 55.5 | 55.5 | 55.5 |
| POPA                   | 0.4           | 0.3 | 0.5  | 0.3      | 0.2 | 0.4  | 0.5           | 0.3  | 0.7  | 0.5      | 0.3  | 0.7  | 0.7  |
| POPC                   | 17.5          | 25  | 10   | 14.7     | 21  | 8.4  | 11.2          | 16   | 6.4  | 11.4     | 16   | 6.8  | 6.8  |
| POPE                   | 14.9          | 10  | 19.8 | 14       | 9.6 | 18.4 | 11.7          | 7.9  | 15.5 | 11.9     | 8.2  | 15.6 | 15.6 |
| POPG                   | 0.2           | 0.2 | 0.2  | 0.2      | 0.2 | 0.2  | 0.1           | 0.1  | 0.1  | 0.1      | 0.1  | 0.1  | 0.1  |
| POPS                   | 4             | 2   | 6    | 3.8      | 2   | 5.6  | 3             | 1.2  | 4.8  | 3.3      | 1.6  | 5    | 5    |
| POPI                   | 6             | 0   | 12   | 5        | 0   | 10   | 4             | 0    | 8    | 4        | 0    | 8    | 8    |
| PSM                    | 8.5           | 14  | 3    | 8        | 13  | 3    | 7             | 12   | 2    | 8        | 13   | 3    | 3    |
| CER1                   | 2.5           | 2.5 | 2.5  | 4        | 4   | 4    | 6             | 6    | 6    | 5.3      | 5.3  | 5.3  | 5.3  |

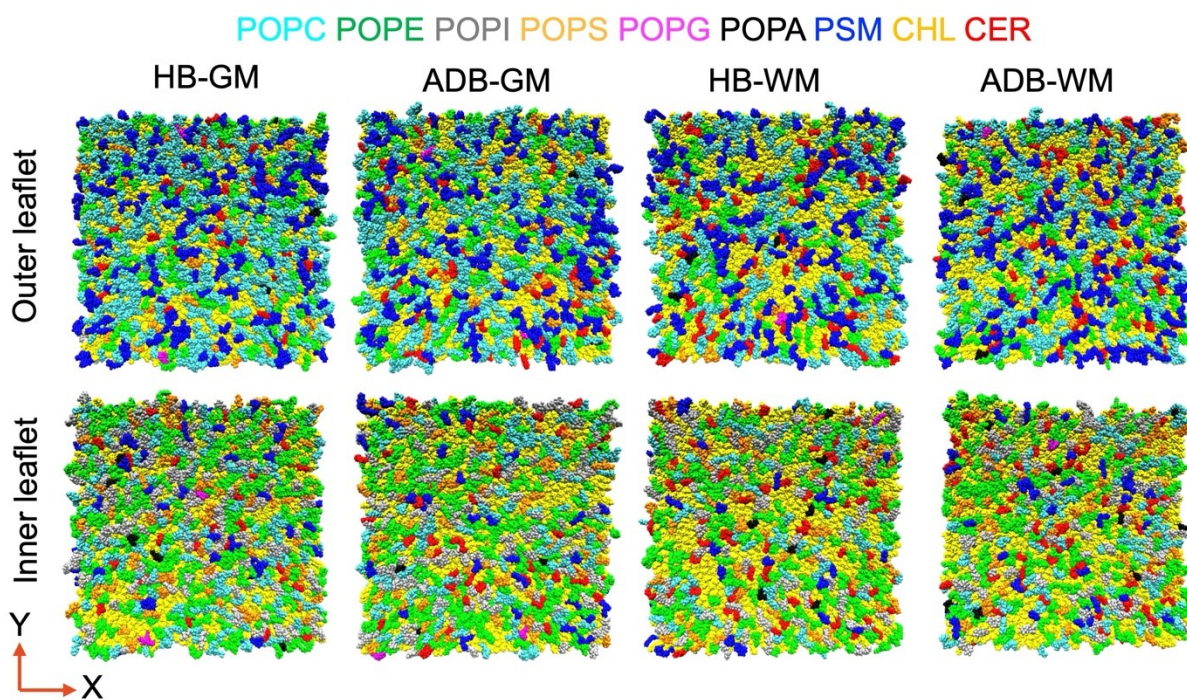

**Fig. S1:** A representative pre-equilibrated structure showing outer and inner leaflets and the spatial distribution of lipid components in the GM and WM regions modeled from the lipidomics data of postmortem frozen brain tissues of subjects with AD pathology (ADB), and compared to the healthy age-matched controls (HB), with each lipid colored uniquely.

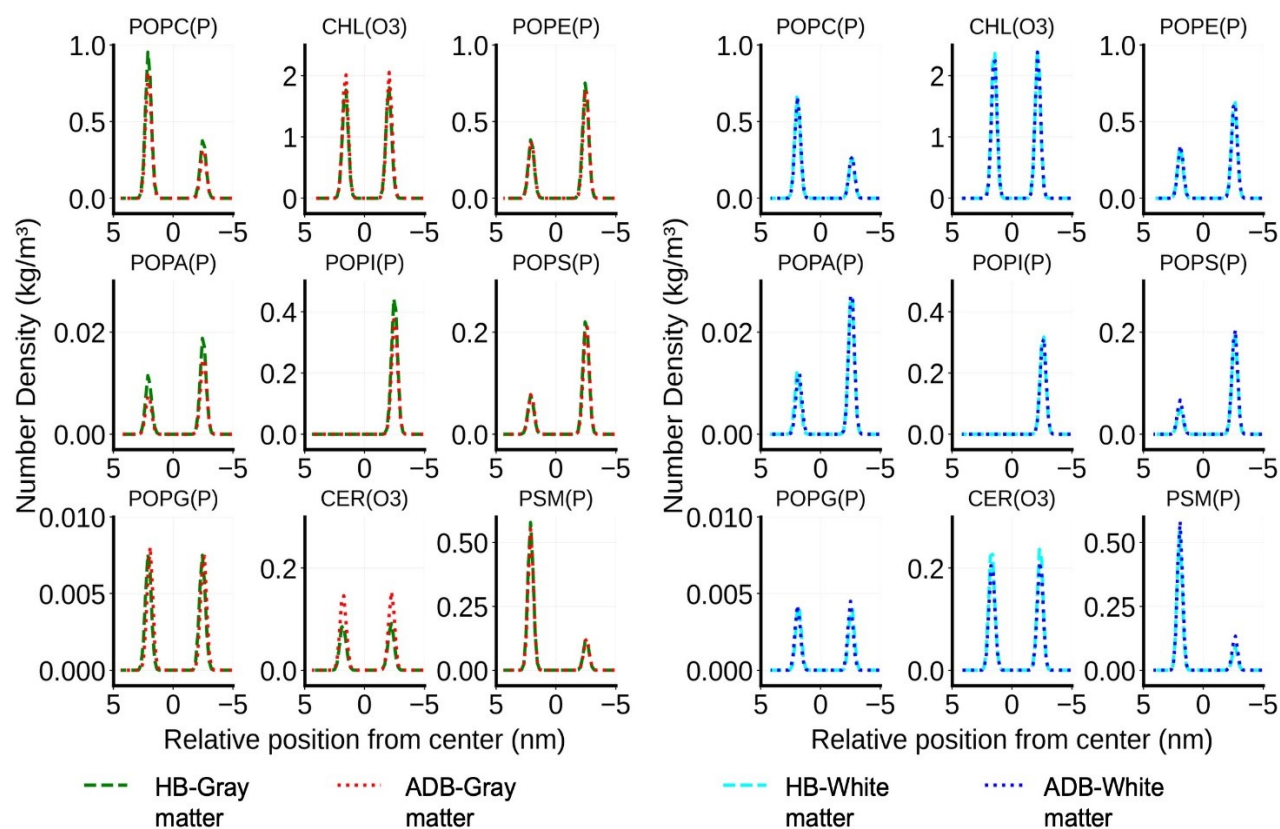

**Fig. S2:** The number density distribution of all lipids across the four systems. HB: healthy membrane model, ADB: AD-mimicking diseased model membrane.

**Table S3:** Membrane bilayer structural properties of all the systems. The area per lipid as determined using the “Phosphorous” atom of POPC, POPE, POPS, POPI, POPA, POPG, PSM, and the O3 atom of CER, CHL as reference. The membrane thickness is determined using the “Phosphorous” atom of POPC, POPE, POPS, POPI, POPA, POPG, and PSM as the reference. The data is shown as mean  $\pm$  standard deviation. Each property is calculated over the concatenated 1.5  $\mu$ s of the trajectory for each system.

| Property                                                                              | Gray matter       |                   | White matter      |                   |
|---------------------------------------------------------------------------------------|-------------------|-------------------|-------------------|-------------------|
|                                                                                       | HB                | ADB               | HB                | ADB               |
| Area per lipid<br>(Phospholipids-<br>'P', CER- 'O3',<br>CHL- 'O3') (nm <sup>2</sup> ) | 0.42 $\pm$ 0.0014 | 0.42 $\pm$ 0.0013 | 0.41 $\pm$ 0.0012 | 0.41 $\pm$ 0.0012 |
| Thickness<br>(Phospholipids-<br>'P') (nm)                                             | 4.59 $\pm$ 0.0128 | 4.57 $\pm$ 0.0125 | 4.53 $\pm$ 0.0136 | 4.54 $\pm$ 0.0130 |
| Interdigitation                                                                       | 0.208 $\pm$ 0.021 | 0.205 $\pm$ 0.020 | 0.201 $\pm$ 0.187 | 0.201 $\pm$ 0.018 |
| Cholesterol Tilt<br>angle<br>(‘C13-C10’)                                              | 12.05 $\pm$ 0.326 | 11.75 $\pm$ 0.314 | 11.24 $\pm$ 0.289 | 11.27 $\pm$ 0.285 |

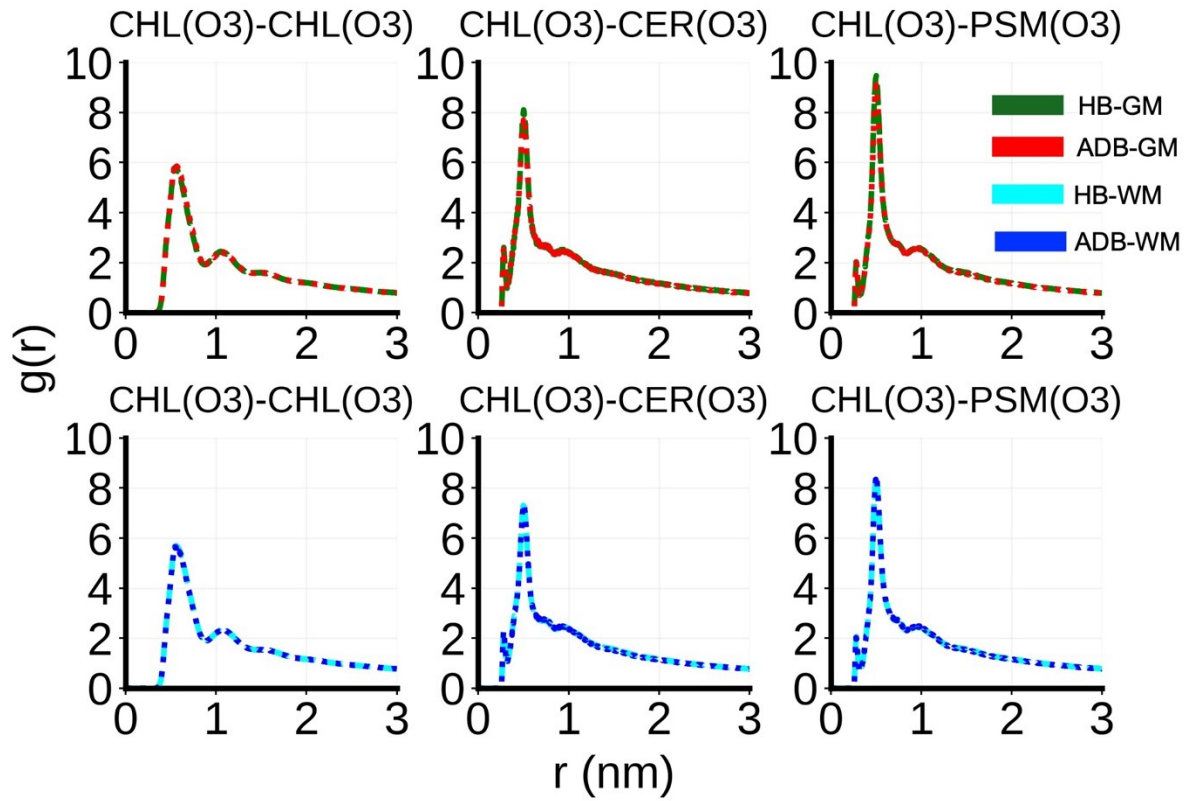

**Fig. S3:** The radial density function (RDF) profile of cholesterol, ceramide, and sphingomyelin around cholesterol. (HB: healthy membrane model, ADB: AD-mimicking diseased model membrane, GM: gray matter, WM: white matter).

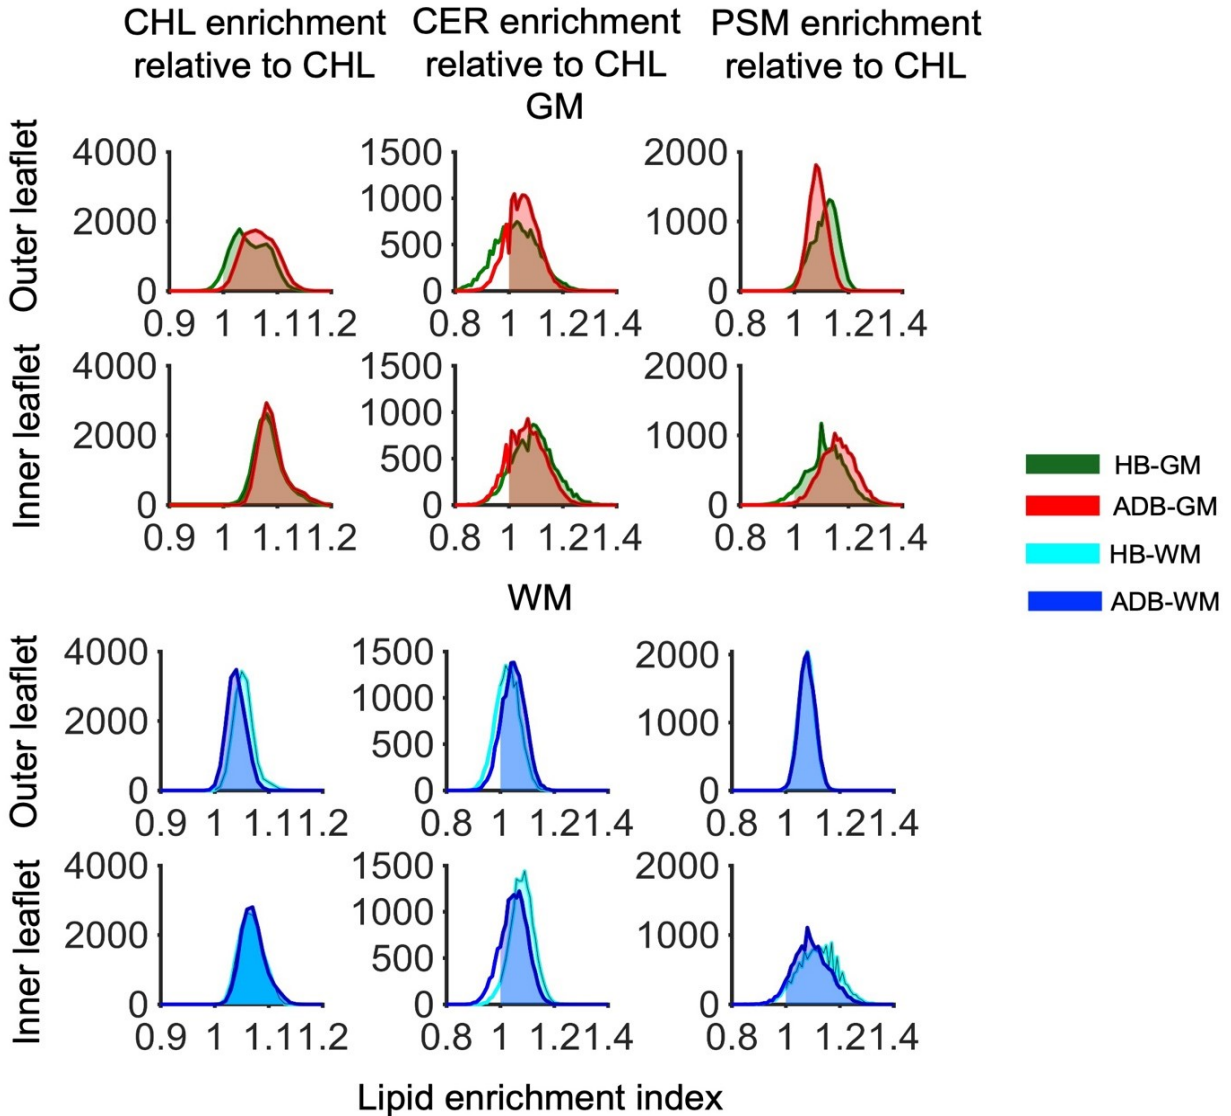

**Fig. S4:** The distribution of enrichment index of cholesterol, ceramide, and sphingomyelin relative to cholesterol across the leaflets of healthy (HB) and diseased membranes (ADB) in the GM (gray matter) and WM (white matter) region. (HB: healthy membrane model, ADB: AD-mimicking diseased model membrane, GM: gray matter, WM: white matter).

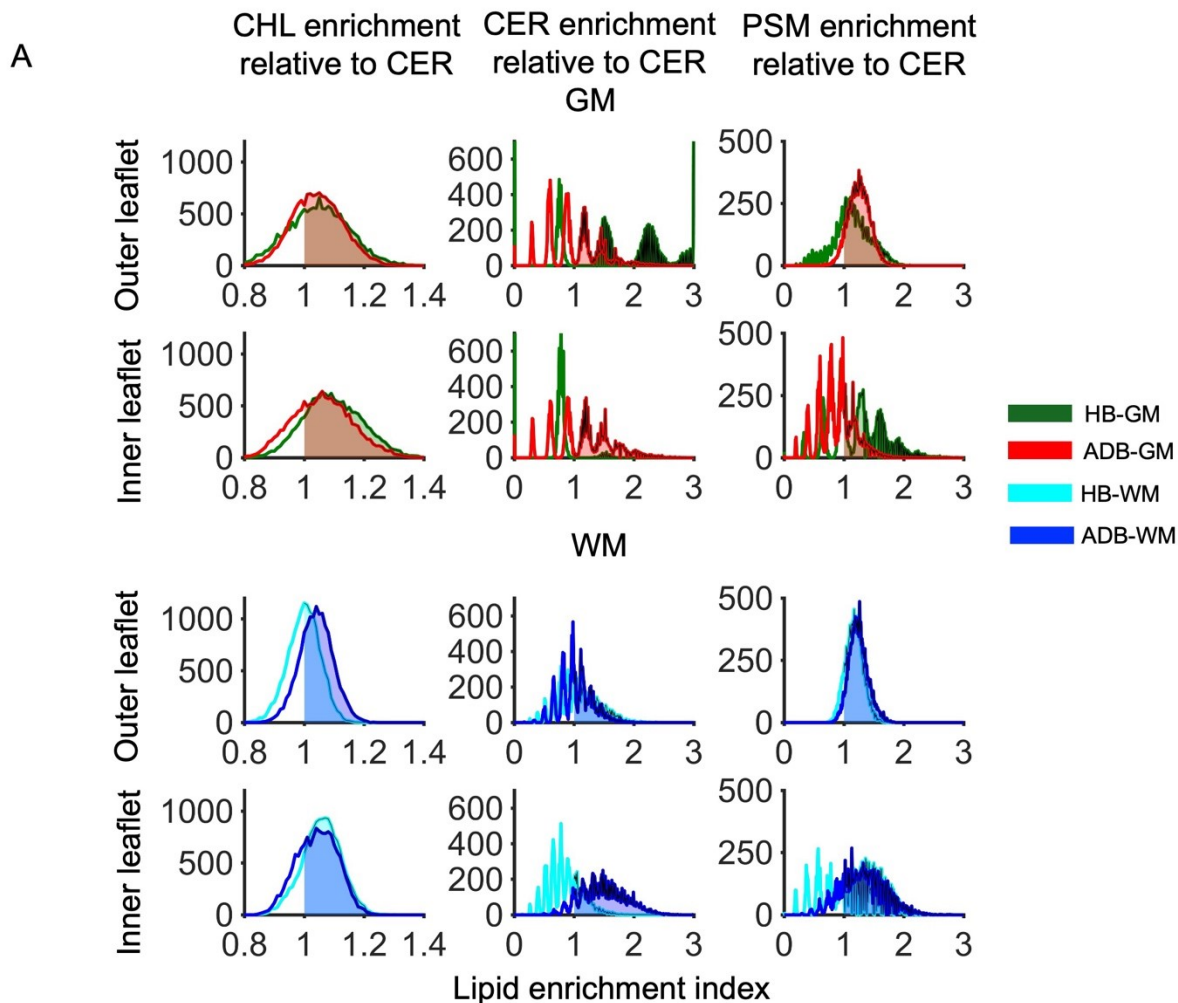

**Fig. S5:** The enrichment index distribution of cholesterol, ceramide, and sphingomyelin relative to ceramide across the leaflets of healthy (HB) and diseased membranes (ADB) in the GM (gray matter) and WM (white matter) region. (HB: healthy membrane model, ADB: AD-mimicking diseased model membrane, GM: gray matter, WM: white matter).

**Table S4:** Area under the curve values, obtained from the enrichment index value distribution curve (Fig. S4), for regions with enrichment values greater than or equal to 1. (HB: healthy membrane model, ADB: AD-mimicking diseased model membrane, OL: outer leaflet, IL: inner leaflet, GM: gray matter, WM: white matter, CHL-Cholesterol, CER- *N*-palmitoyl-d-erythro-sphingosine, PSM- *N*-palmitoyl-d-erythro-sphingosine phosphorylcholine).

| Membrane type | CHL-CHL |        | CER-CHL |        | PSM-CHL |        |
|---------------|---------|--------|---------|--------|---------|--------|
|               | OL      | IL     | OL      | IL     | OL      | IL     |
| <b>HB-GM</b>  | 141.85  | 150.03 | 94.29   | 132.43 | 148.27  | 141.21 |
| <b>ADB-GM</b> | 149.25  | 150.03 | 120.71  | 123.96 | 149.48  | 149.18 |
| <b>HB-WM</b>  | 149.98  | 150.02 | 109.19  | 143.88 | 149.5   | 142.4  |
| <b>ADB-WM</b> | 149.07  | 150.02 | 129.07  | 125.61 | 149.5   | 139.7  |

**Table S5:** Area under the curve values, obtained from the enrichment index value distribution curve (Fig. S5), for regions with enrichment values greater than or equal to 1. (HB: healthy membrane model, ADB: AD-mimicking diseased neuronal model membrane, OL: outer leaflet, IL: inner leaflet, GM: gray matter, WM: white matter, CHL-Cholesterol, CER- *N*-palmitoyl-d-erythro-sphingosine, PSM- *N*-palmitoyl-d-erythro-sphingosine phosphorylcholine).

| <b>Membrane type</b> | <b>CHL-CER</b> |        | <b>CER-CER</b> |       | <b>PSM-CER</b> |        |
|----------------------|----------------|--------|----------------|-------|----------------|--------|
|                      | OL             | IL     | OL             | IL    | OL             | IL     |
| <b>HB-GM</b>         | 101.37         | 125.61 | 86.5           | 2.9   | 107.91         | 100.8  |
| <b>ADB-GM</b>        | 103.36         | 107.54 | 64.7           | 85.5  | 138.12         | 50.8   |
| <b>HB-WM</b>         | 76.51          | 122.76 | 87.1           | 45.2  | 130.98         | 92.53  |
| <b>ADB-WM</b>        | 114.53         | 108.13 | 77.2           | 136.3 | 142.34         | 121.62 |

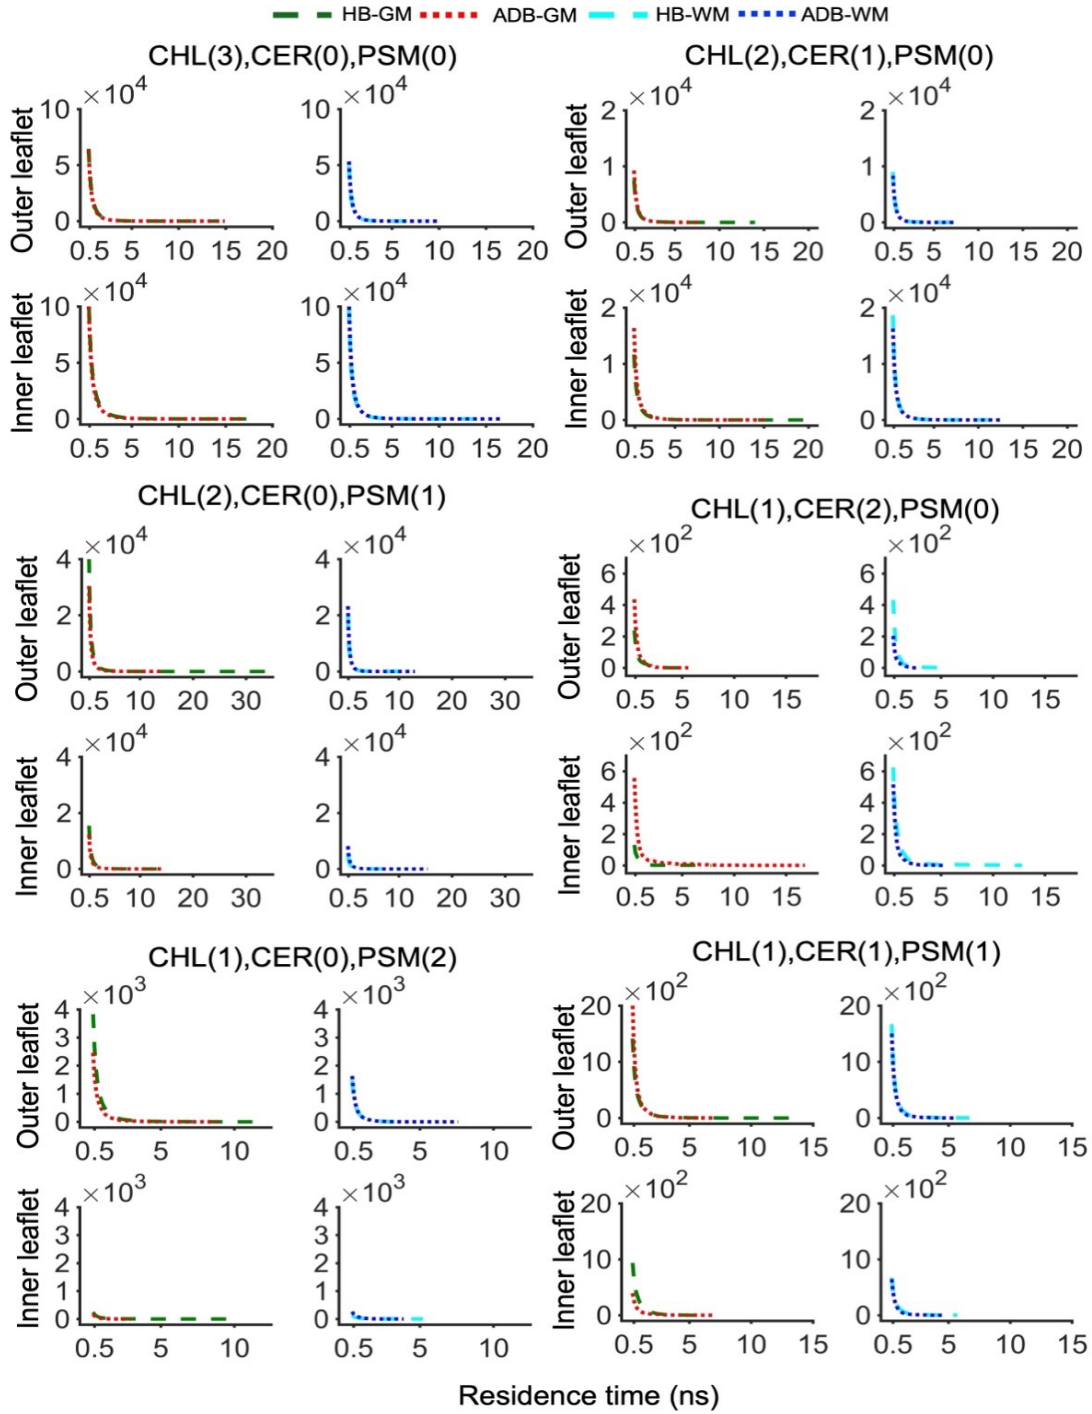

**Fig. S6:** Residence time distributions of different compositions of microdomains of size 3 calculated from the 1.5  $\mu\text{s}$  concatenated trajectory. (HB: healthy membrane model, ADB: AD-mimicking diseased model membrane, GM: gray matter, WM: white matter).

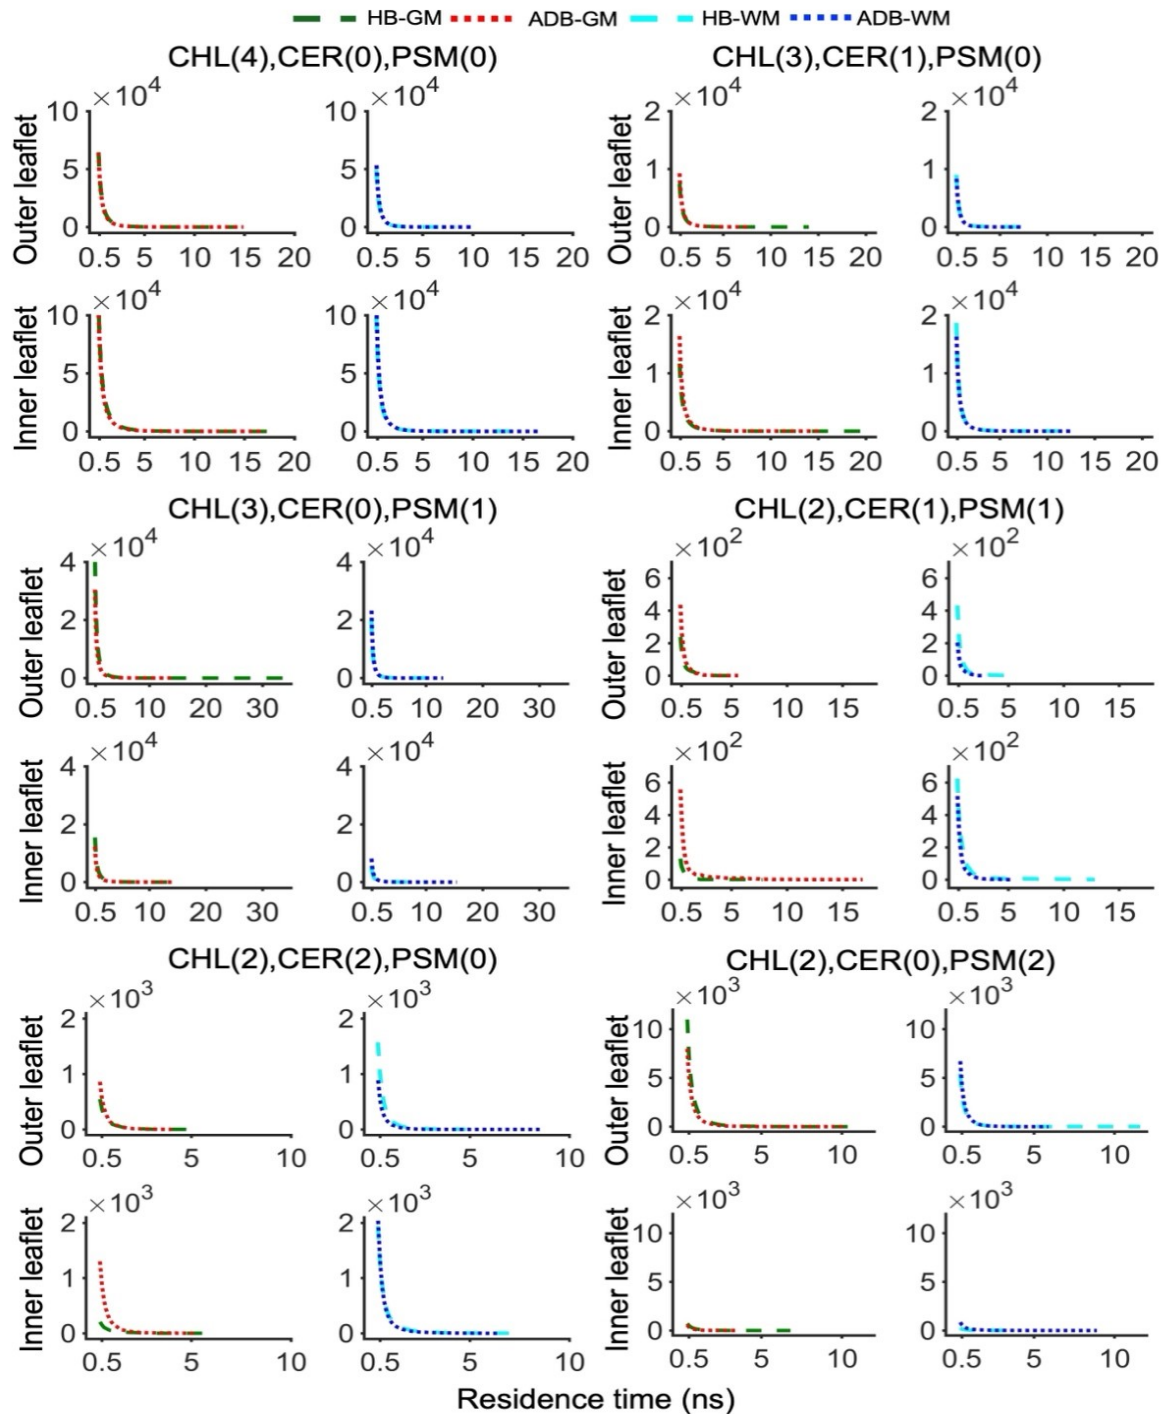

**Fig. S7:** Residence time distributions of different compositions of microdomains of size 4 calculated from the 1.5  $\mu$ s concatenated trajectory. (HB: healthy membrane model, ADB: AD-mimicking diseased model membrane, GM: gray matter, WM: white matter).

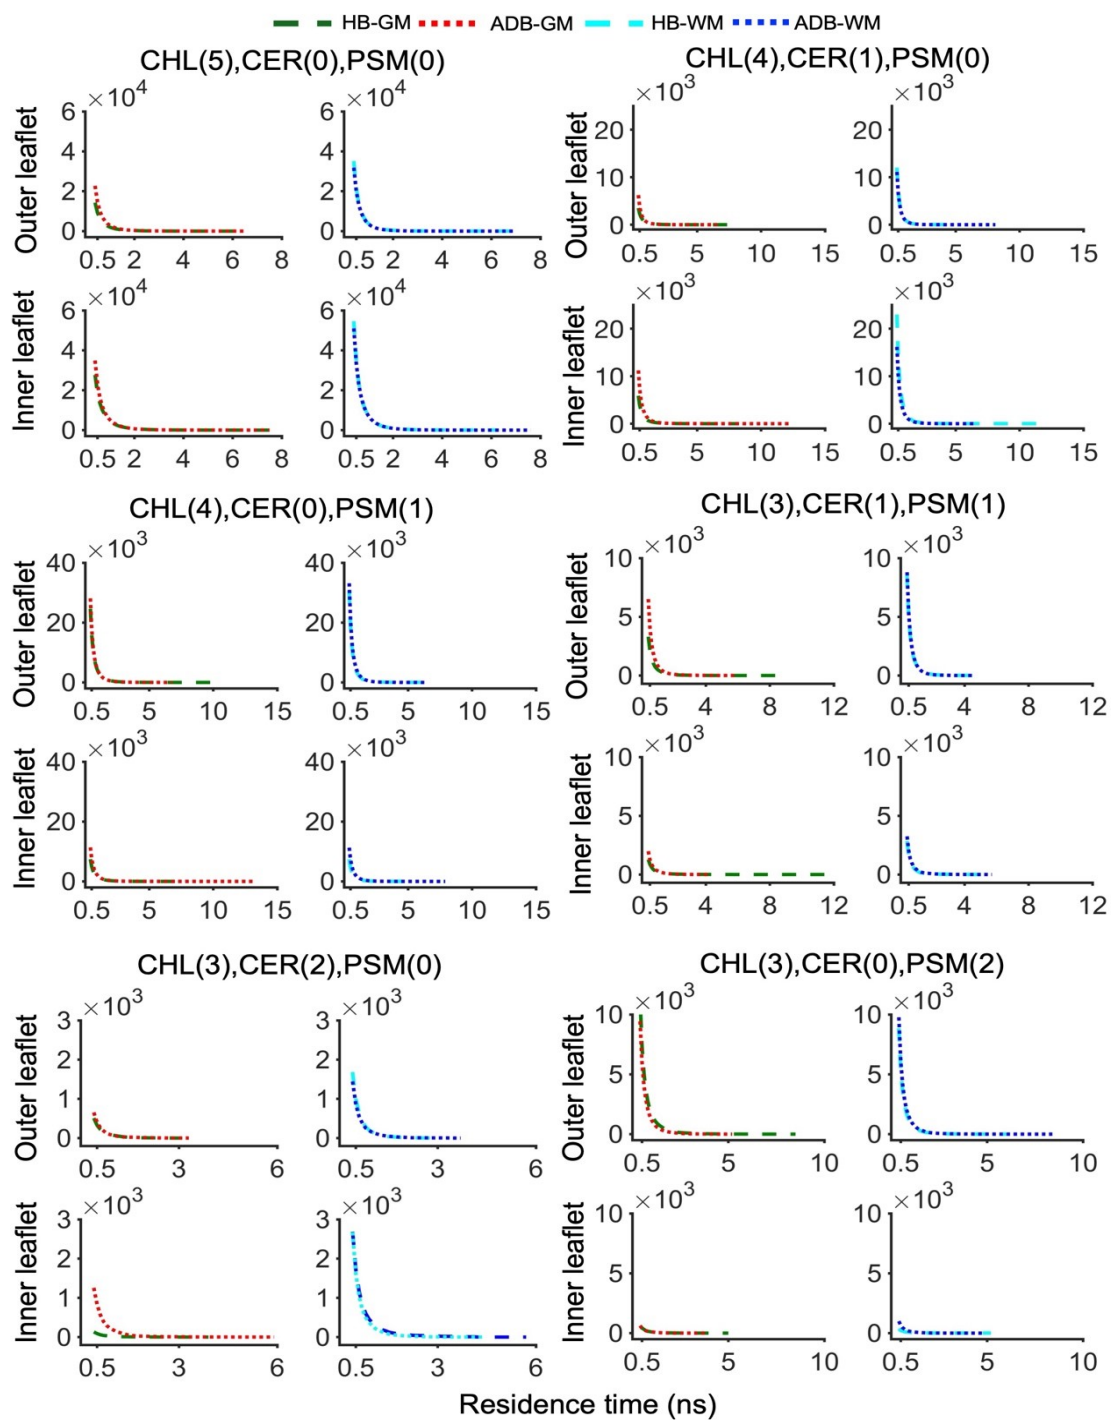

**Fig. S8:** Residence time distributions of different compositions of microdomains of size 5 calculated from the 1.5  $\mu$ s concatenated trajectory. (HB: healthy membrane model, ADB: AD-mimicking diseased model membrane, GM: gray matter, WM: white matter).

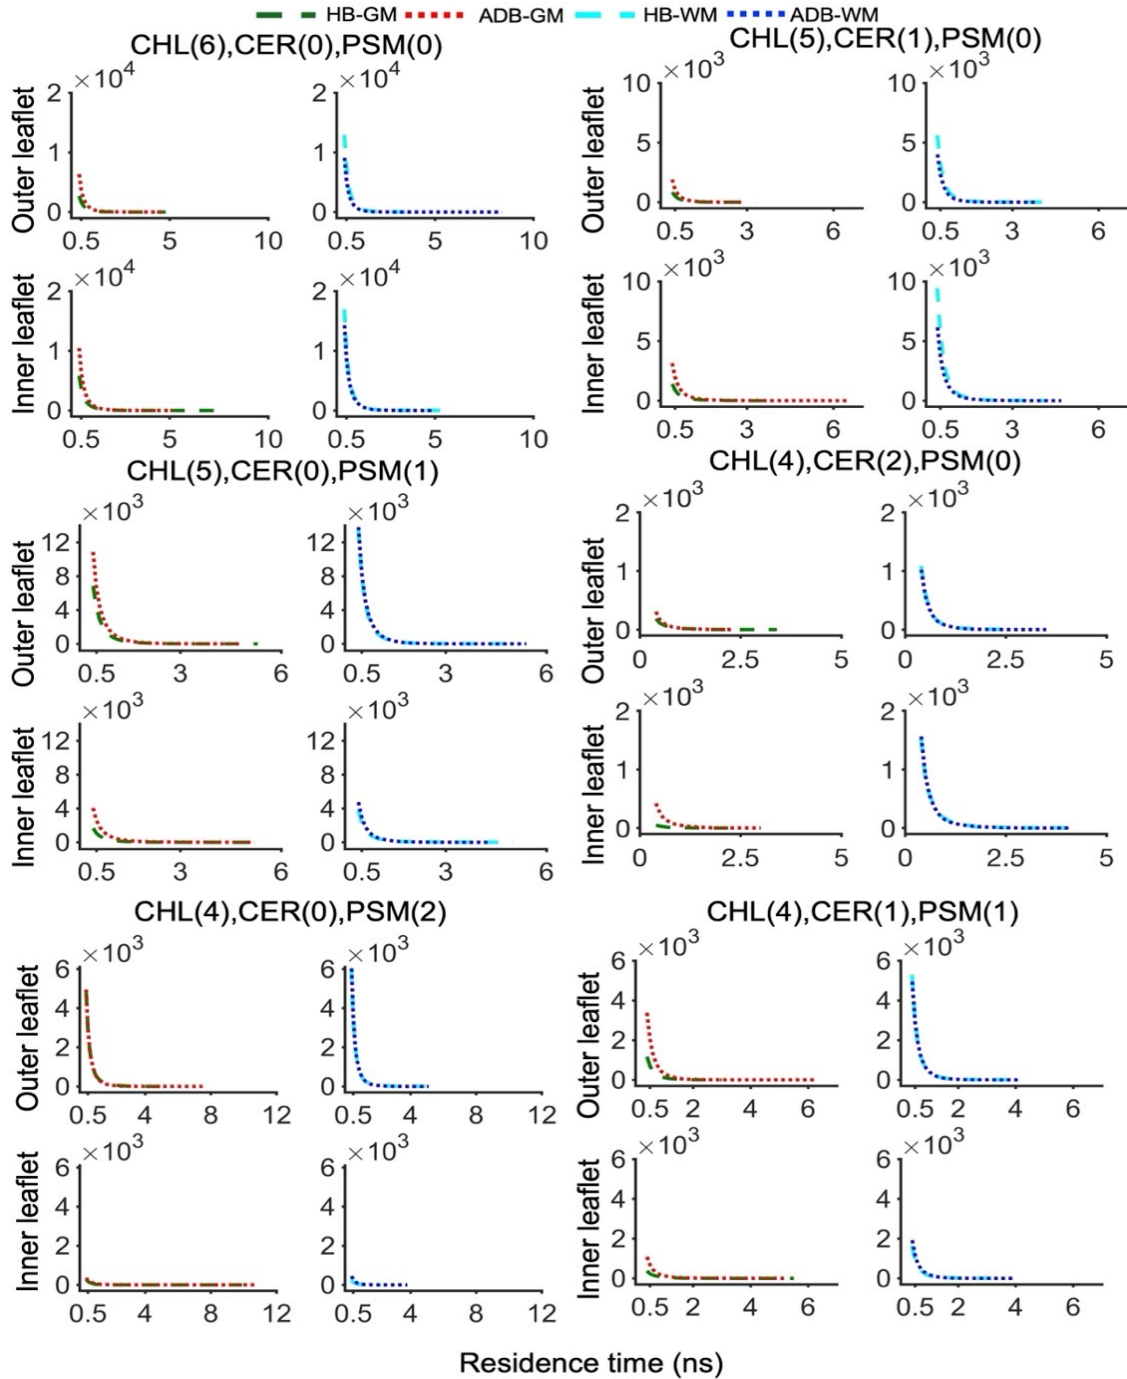

**Fig. S9:** Residence time distributions of different compositions of microdomains of size 6 calculated from the 1.5  $\mu\text{s}$  concatenated trajectory. (HB: healthy membrane model, ADB: AD-mimicking diseased model membrane, GM: gray matter, WM: white matter).

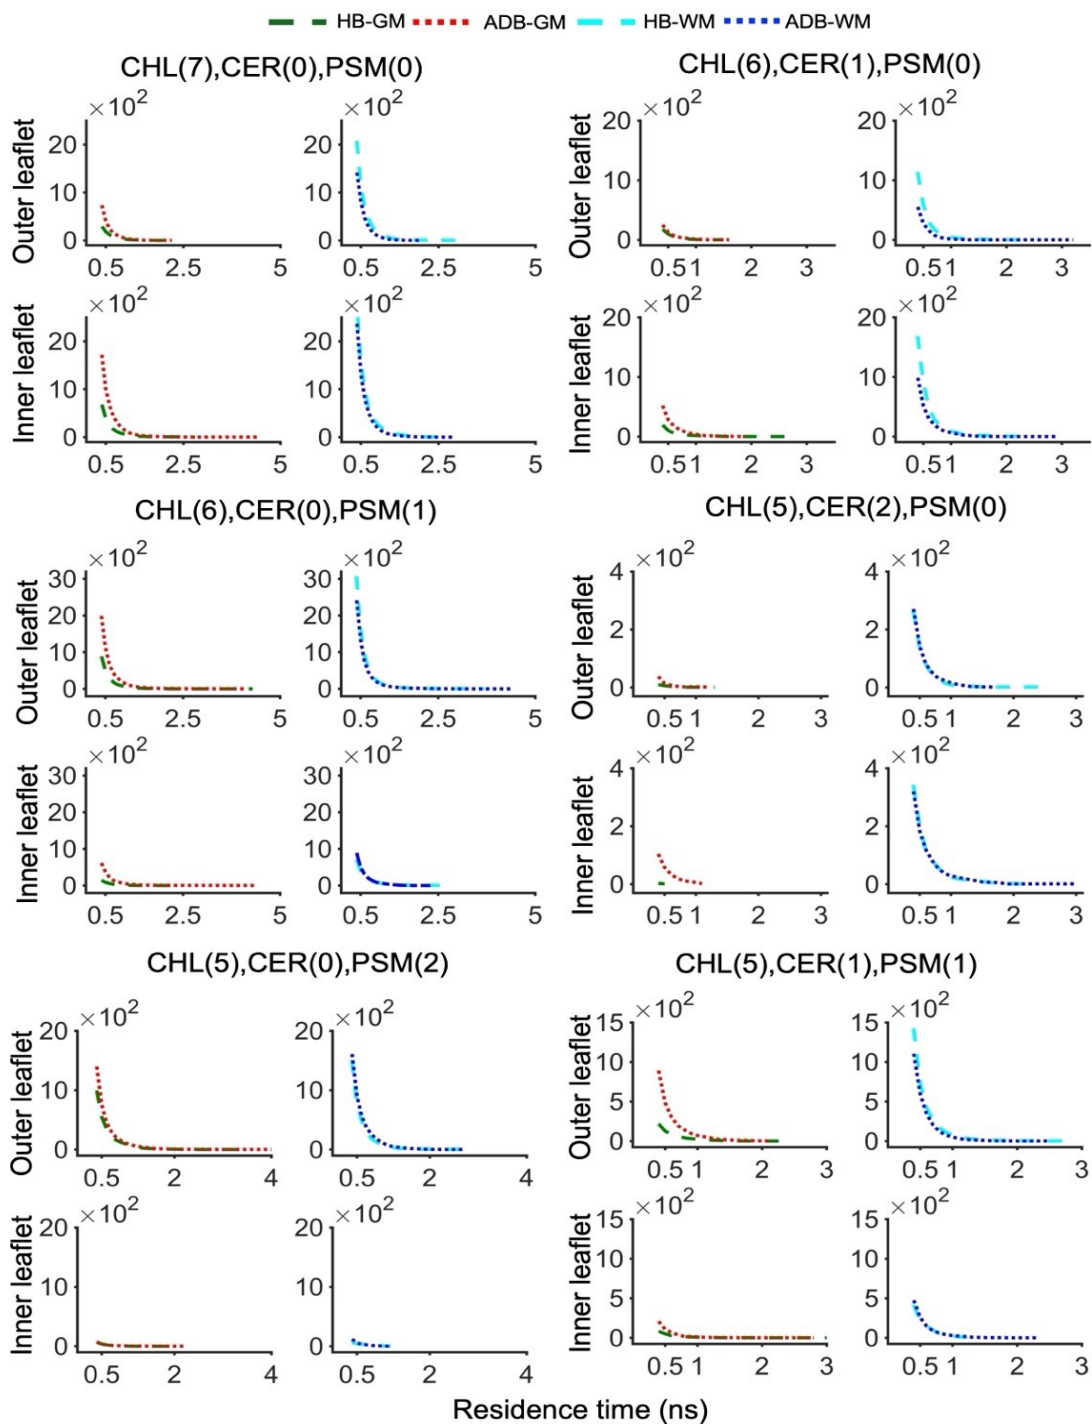

**Fig. S10:** Residence time distributions of different compositions of microdomains of size 7 calculated from the 1.5  $\mu\text{s}$  concatenated trajectory. (HB: healthy membrane model, ADB: AD-mimicking diseased model membrane, GM: gray matter, WM: white matter).

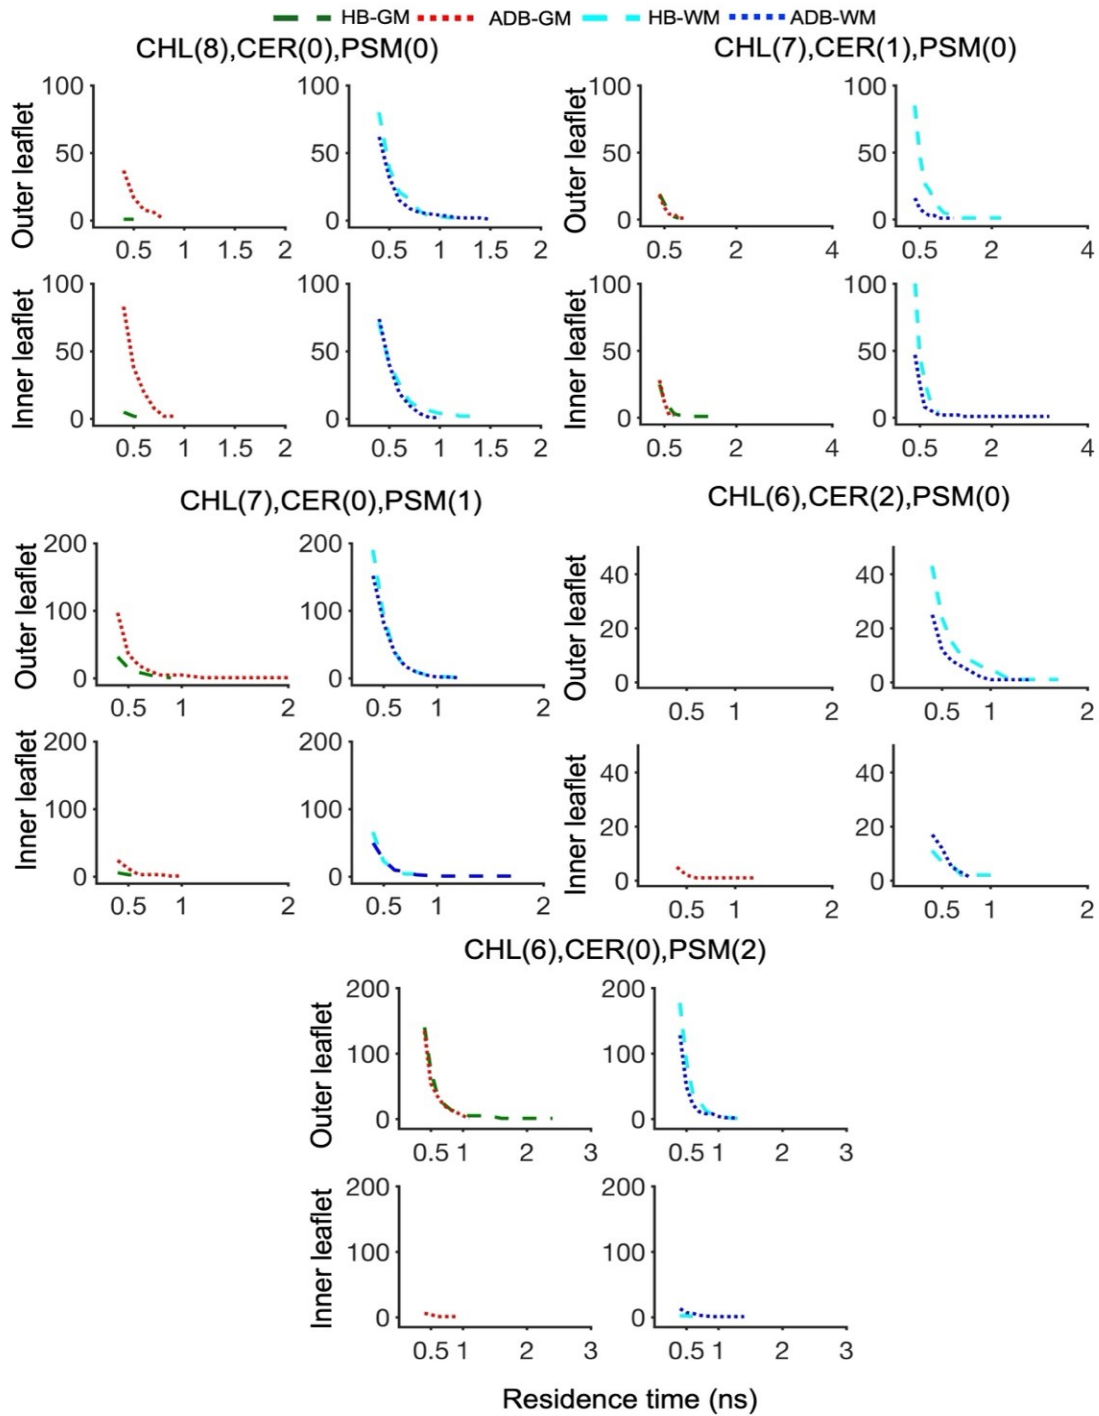

**Fig. S11:** Residence time distributions of different compositions of microdomains of size 8 calculated from the 1.5  $\mu$ s concatenated trajectory. (HB: healthy membrane model, ADB: AD-mimicking diseased model membrane, GM: gray matter, WM: white matter).
